# Supplementary material for: Noble gas insertion compounds of hydrogenated and lithiated hyperhalogens
Source: Royal Society of Chemistry journal article supplement (doi:10.1039/c9cp01284b), 2019-01-01
Supplement: c9cp01284b1.pdf [file c9cp01284b1.pdf]

## Supplementary Information

### Noble Gas Insertion Compounds of Hydrogenated and Lithiated Hyperhalogens

Xiao-Ting Chang,<sup>1</sup> Ying Li,<sup>1</sup> Jia-Yuan Liu,<sup>2</sup> Hai-Di Ma,<sup>2</sup> Di Wu\*<sup>1</sup>.

<sup>1</sup> *Laboratory of Theoretical and Computational Chemistry, Institute of Theoretical Chemistry, Jilin University, Changchun 130023, P. R. China*

<sup>2</sup> *Institute of Applied Chemistry, Hebei North University, Zhangjiakou 075000, China*

**Table S1** Symmetry Point Group, NPA charge on H, Li and M atoms ( $q$ , |e|) for the H/LiBO<sub>2</sub> and H/LiM(BO<sub>2</sub>)<sub>2</sub> (M = Cu, Ag, Au) compounds at the  $\omega$ B97X-D/def2-TZVPP level.

| isomers                | symmetry | $q(\text{H})$ | $q(\text{M})$ | isomers                 | symmetry       | $q(\text{Li})$ | $q(\text{M})$ |
|------------------------|----------|---------------|---------------|-------------------------|----------------|----------------|---------------|
| <b>HBO<sub>2</sub></b> | $C_s$    | 0.52          |               | <b>LiBO<sub>2</sub></b> | $C_{\infty v}$ | 0.98           |               |
| <b>a1</b>              | $C_s$    | 0.55          | 0.87          | <b>A1</b>               | $C_{2v}$       | 0.97           | 0.84          |
| <b>a2</b>              | $C_s$    | 0.54          | 0.80          | <b>A2</b>               | $C_s$          | 0.97           | 0.86          |
| <b>a3</b>              | $C_s$    | 0.55          | 0.80          | <b>A3</b>               | $C_{2v}$       | 0.97           | 0.92          |
| <b>a4</b>              | $C_{2v}$ | 0.10          | 1.23          |                         |                |                |               |
| <b>b1</b>              | $C_s$    | 0.54          | 0.90          | <b>B1</b>               | $C_{2v}$       | 0.96           | 0.86          |
| <b>b2</b>              | $C_1$    | 0.54          | 0.82          | <b>B2</b>               | $C_s$          | 0.97           | 0.90          |
| <b>b3</b>              | $C_s$    | 0.55          | 0.82          | <b>B3</b>               | $C_{2v}$       | 0.97           | 0.92          |
| <b>b4</b>              | $C_2$    | 0.15          | 1.17          |                         |                |                |               |
| <b>c1</b>              | $C_s$    | 0.56          | 0.75          | <b>C1</b>               | $C_{2v}$       | 0.96           | 0.67          |
| <b>c2</b>              | $C_1$    | 0.54          | 0.64          | <b>C2</b>               | $C_s$          | 0.96           | 0.74          |
| <b>c3</b>              | $C_1$    | 0.56          | 0.63          | <b>C3</b>               | $C_s$          | 0.97           | 0.59          |
| <b>c4</b>              | $C_1$    | 0.17          | 1.10          | <b>C4</b>               | $C_{2v}$       | 0.97           | 0.85          |

\*Corresponding author.  
Email address: wud@jlu.edu.cn

**Table S2** NPA charge on H, M and Ng (Ng = Xe, Ar, Kr) atoms ( $q$ , |e|), Symmetry Point Group, ZPE-corrected dissociation energy ( $E_{dis}$ , kcal/mol), reaction enthalpy ( $\Delta H$ , kcal/mol), and reaction Gibbs free energy ( $\Delta G$ , kcal/mol) at 298.15 K for dissociation channels of high-lying Ng (Ng = Xe, Ar, Kr) insertion compounds of HBO<sub>2</sub> and HM(BO<sub>2</sub>)<sub>2</sub> (M = Cu, Ag, Au) at the  $\omega$ B97X-D/def2-TZVPP level. BSSE-corrected binding energy ( $E_b$ , kcal/mol) of these species at the CCSD (T)/def2-TZVPP level.

| isomers       | <i>symmetry</i> | dissociation channel                    | $E_{dis}$ | $\Delta H$ | $\Delta G$ | $E_b$ | $q(\text{H})$ | $q(\text{Ng})$ | $q(\text{M})$ |
|---------------|-----------------|-----------------------------------------|-----------|------------|------------|-------|---------------|----------------|---------------|
| <b>ii-Xe</b>  | $C_s$           | HO+Xe+BO                                | 14.5      | 16.0       | -0.9       | -4.5  | 0.45          | 0.83           |               |
| <b>ii-Ar</b>  | $C_s$           | HO+Ar+BO                                | -31.4     | -29.9      | -46.5      | -44.1 | 0.43          | 0.51           |               |
| <b>ii-Kr</b>  | $C_s$           | HO+Kr+BO                                | -11.5     | -63.3      | -26.9      | -26.7 | 0.44          | 0.66           |               |
| <b>iii-Xe</b> | $C_1$           | HOB +XeO                                | 5.6       | 5.2        | -0.8       | 34.9  | 0.55          | 0.87           |               |
| <b>iii-Ar</b> | $C_s$           | HOB +ArO                                | 3.1       | 2.7        | -3.4       | 5.7   | 0.55          | 0.55           |               |
| <b>iii-Kr</b> | $C_s$           | HOB +KrO                                | 4.0       | 3.7        | -2.9       | 17.4  | 0.55          | 0.69           |               |
| <b>d2-Xe</b>  | $C_1$           | Xe+HCu(BO <sub>2</sub> ) <sub>2</sub>   | -53.6     | -53.9      | -58.3      | 33.0  | 0.55          | 0.26           | 0.66          |
|               |                 | HBO <sub>2</sub> +Xe+Cu+BO <sub>2</sub> | 65.1      | 65.1       | 44.7       |       |               |                |               |
| <b>d3-Xe</b>  | $C_s$           | Xe+HCu(BO <sub>2</sub> ) <sub>2</sub>   | -75.9     | -75.9      | -82.2      | 37.1  | 0.56          | 0.29           | 0.62          |
|               |                 | HBO <sub>2</sub> +Xe+Cu+BO <sub>2</sub> | 42.8      | 43.1       | 20.9       |       |               |                |               |
| <b>e2-Xe</b>  | $C_s$           | Xe+HAg(BO <sub>2</sub> ) <sub>2</sub>   | -45.2     | -45.5      | -50.7      | 27.2  | 0.55          | 0.24           | 0.67          |
|               |                 | HBO <sub>2</sub> +Xe+Ag+BO <sub>2</sub> | 47.8      | 47.7       | 27.5       |       |               |                |               |
| <b>e3-Xe</b>  | $C_s$           | Xe+HAg(BO <sub>2</sub> ) <sub>2</sub>   | -63.8     | -63.9      | -70.1      | 30.7  | 0.55          | 0.27           | 0.63          |
|               |                 | HBO <sub>2</sub> +Xe+Ag+BO <sub>2</sub> | 29.2      | 29.3       | 8.1        |       |               |                |               |
| <b>f2-Xe</b>  | $C_s$           | Xe+HAu(BO <sub>2</sub> ) <sub>2</sub>   | -46.2     | -46.6      | -51.4      | 49.6  | 0.55          | 0.41           | 0.44          |
|               |                 | HBO <sub>2</sub> +Xe+Au+BO <sub>2</sub> | 42.4      | 42.4       | 21.0       |       |               |                |               |
| <b>f3-Xe</b>  | $C_s$           | Xe+HAu(BO <sub>2</sub> ) <sub>2</sub>   | -64.3     | -64.5      | -70.3      | 59.5  | 0.55          | 0.46           | 0.36          |
|               |                 | HBO <sub>2</sub> +Xe+Au+BO <sub>2</sub> | 24.3      | 24.5       | 2.1        |       |               |                |               |
| <b>f4-Xe</b>  | $C_s$           | Xe+HAu(BO <sub>2</sub> ) <sub>2</sub>   | -63.0     | -62.7      | -69.9      | 3.3   | 0.15          | 0.77           | 0.60          |
|               |                 | H+Xe+Au(BO <sub>2</sub> ) <sub>2</sub>  | 20.8      | 22.0       | 7.9        |       |               |                |               |

**Table S3** NPA charge on Li, M and Xe atoms ( $q$ , |e|), Symmetry Point Group, ZPE-corrected dissociation energy ( $E_{dis}$ , kcal/mol), reaction enthalpy ( $\Delta H$ , kcal/mol), and reaction Gibbs free energy ( $\Delta G$ , kcal/mol) at 298.15 K for dissociation channels of high-lying Xe insertion compounds of  $\text{LiBO}_2$  and  $\text{LiM}(\text{BO}_2)_2$  ( $M = \text{Cu, Ag, Au}$ ) at the  $\omega\text{B97X-D/def2-TZVPP}$  level. BSSE-corrected binding energy ( $E_b$ , kcal/mol) of these species at the CCSD (T)/def2-TZVPP level.

| isomers      | symmetry | dissociation channel                   | $E_{dis}$ | $\Delta H$ | $\Delta G$ | $E_b$ | $q(\text{Li})$ | $q(\text{Xe})$ | $q(\text{M})$ |
|--------------|----------|----------------------------------------|-----------|------------|------------|-------|----------------|----------------|---------------|
| <b>D2-Xe</b> | $C_1$    | Xe+LiCu(BO <sub>2</sub> ) <sub>2</sub> | -79.6     | -80.6      | -81.4      | 29.9  | 0.99           | 0.24           | 0.67          |
|              |          | LiBO <sub>2</sub> +CuXeBO <sub>2</sub> | 54.5      | 54.2       | 46.8       |       |                |                |               |
| <b>E2-Xe</b> | $C_1$    | Xe+LiAg(BO <sub>2</sub> ) <sub>2</sub> | -73.6     | -74.6      | -76.0      | 23.6  | 0.99           | 0.22           | 0.68          |
|              |          | LiBO <sub>2</sub> +AgXeBO <sub>2</sub> | 42.2      | 41.9       | 34.3       |       |                |                |               |
| <b>F2-Xe</b> | $C_1$    | Xe+LiAu(BO <sub>2</sub> ) <sub>2</sub> | -71.0     | -71.8      | -73.6      | 44.8  | 0.99           | 0.37           | 0.45          |
|              |          | LiBO <sub>2</sub> +AuXeBO <sub>2</sub> | 45.7      | 45.4       | 37.7       |       |                |                |               |
| <b>F3-Xe</b> | $C_s$    | Xe+LiAu(BO <sub>2</sub> ) <sub>2</sub> | -50.1     | -50.5      | -55.6      | 38.8  | 0.98           | 0.41           | 0.38          |
|              |          | LiBO <sub>2</sub> +AuXeBO <sub>2</sub> | 31.6      | 31.3       | 23.2       |       |                |                |               |

**Table S4** Electron density descriptors (au.) at the bond critical points (BCPs) and Wiberg bond indices (WBI) of important bonds at the  $\omega$ B97X-D/def2-TZVPP level.

| isomers       | bond  | WBI  | $\rho(r_c)$ | $\nabla^2\rho(r_c)$ | $G(r_c)$ | $V(r_c)$ | $H(r_c)$ |
|---------------|-------|------|-------------|---------------------|----------|----------|----------|
| <b>ii-Xe</b>  | Xe-O  | 0.34 | 0.105       | 0.158               | 0.081    | -0.122   | -0.041   |
|               | Xe-B  | 0.83 | 0.105       | -0.085              | 0.030    | -0.081   | -0.051   |
| <b>iii-Xe</b> | Xe-O  | 1.06 | 0.169       | 0.108               | 0.127    | -0.227   | -0.100   |
|               | Xe-B  | 0.06 | 0.015       | 0.034               | 0.008    | -0.007   | 0.001    |
| <b>d2-Xe</b>  | Xe-O  | 0.05 | 0.035       | 0.116               | 0.029    | -0.030   | 0.000    |
|               | Xe-Cu | 0.58 | 0.073       | 0.150               | 0.060    | -0.083   | -0.023   |
| <b>d3-Xe</b>  | Xe-O  | 0.07 | 0.040       | 0.125               | 0.033    | -0.035   | -0.002   |
|               | Xe-Cu | 0.61 | 0.074       | 0.144               | 0.059    | -0.083   | -0.023   |
| <b>e2-Xe</b>  | Xe-O  | 0.05 | 0.035       | 0.114               | 0.029    | -0.030   | -0.001   |
|               | Xe-Ag | 0.51 | 0.064       | 0.131               | 0.048    | -0.062   | -0.015   |
| <b>e3-Xe</b>  | Xe-O  | 0.07 | 0.040       | 0.123               | 0.033    | -0.035   | -0.022   |
|               | Xe-Ag | 0.53 | 0.063       | 0.127               | 0.046    | -0.060   | -0.014   |
| <b>f2-Xe</b>  | Xe-O  | 0.08 | 0.044       | 0.133               | 0.036    | -0.039   | -0.003   |
|               | Xe-Au | 0.66 | 0.088       | 0.103               | 0.056    | -0.086   | -0.030   |
| <b>f3-Xe</b>  | Xe-O  | 0.11 | 0.052       | 0.143               | 0.042    | -0.048   | -0.006   |
|               | Xe-Au | 0.70 | 0.087       | 0.097               | 0.053    | -0.082   | -0.029   |
| <b>f4-Xe</b>  | Xe-O  | 0.08 | 0.044       | 0.133               | 0.036    | -0.040   | -0.033   |
|               | Xe-H  | 0.90 | 0.167       | -0.300              | 0.057    | -0.189   | -0.132   |
| <b>D2-Xe</b>  | Xe-O  | 0.04 | 0.031       | 0.107               | 0.026    | -0.026   | 0.000    |
|               | Xe-Cu | 0.56 | 0.072       | 0.156               | 0.061    | -0.083   | -0.022   |
| <b>E2-Xe</b>  | Xe-O  | 0.04 | 0.031       | 0.101               | 0.025    | -0.025   | 0.000    |
|               | Xe-Ag | 0.48 | 0.062       | 0.137               | 0.048    | -0.062   | -0.014   |
| <b>F2-Xe</b>  | Xe-O  | 0.07 | 0.039       | 0.122               | 0.032    | -0.034   | -0.001   |
|               | Xe-Au | 0.62 | 0.086       | 0.115               | 0.058    | -0.087   | -0.029   |
| <b>F3-Xe</b>  | Xe-O  | 0.09 | 0.045       | 0.131               | 0.036    | -0.040   | -0.003   |
|               | Xe-Au | 0.65 | 0.087       | 0.103               | 0.055    | -0.085   | -0.030   |

**Table S5** Electron density descriptors (au.) at the bond critical points (BCPs) and Wiberg bond indices (WBI) of important bonds at the  $\omega$ B97X-D /def2-TZVPP level.

| isomers       | bond | WBI  | $\rho(r_c)$ | $\nabla^2\rho(r_c)$ | $G(r_c)$ | $V(r_c)$ | $H(r_c)$ |
|---------------|------|------|-------------|---------------------|----------|----------|----------|
| <b>ii-Ar</b>  | Ar-O | 0.28 | 0.106       | 0.250               | 0.087    | -0.111   | -0.024   |
|               | Ar-B | 0.68 | 0.126       | -0.203              | 0.037    | -0.125   | -0.088   |
| <b>iii-Ar</b> | Ar-O | 0.88 | 0.176       | 0.294               | 0.153    | -0.233   | -0.080   |
|               | Ar-B | 0.01 | 0.009       | 0.028               | 0.005    | -0.004   | 0.002    |
| <b>ii-Kr</b>  | Kr-O | 0.30 | 0.107       | 0.201               | 0.083    | -0.115   | -0.032   |
|               | Kr-B | 0.76 | 0.119       | -0.140              | 0.031    | -0.097   | -0.066   |
| <b>iii-Kr</b> | Kr-O | 0.98 | 0.176       | 0.156               | 0.129    | -0.220   | -0.090   |
|               | Kr-B | 0.03 | 0.012       | 0.031               | 0.007    | -0.006   | 0.001    |

**Table S6** Approximate energy barrier ( $\Delta E^\ddagger$ , kcal/mol) for the isomerization  $\text{HXeM}(\text{BO}_2)_2/\text{LiXeM}(\text{BO}_2)_2$  ( $M = \text{Cu, Ag, Au}$ )  $\rightarrow$   $\text{XeHM}(\text{BO}_2)_2/\text{XeLiM}(\text{BO}_2)_2$  at the  $\omega\text{B97X-D/def2-TZVPP}$  level.

| isomers      | $\Delta E^\ddagger$ | isomers      | $\Delta E^\ddagger$ |
|--------------|---------------------|--------------|---------------------|
| <b>d1-Xe</b> | 0.66                | <b>D1-Xe</b> | 1.56                |
| <b>d2-Xe</b> | 2.82                | <b>D2-Xe</b> | 3.70                |
| <b>d3-Xe</b> | 3.43                |              |                     |
| <b>e1-Xe</b> | 0.70                | <b>E1-Xe</b> | 1.27                |
| <b>e2-Xe</b> | 2.73                | <b>E2-Xe</b> | 0.67                |
| <b>e3-Xe</b> | 3.74                |              |                     |
| <b>f1-Xe</b> | 1.54                | <b>F1-Xe</b> | 2.81                |
| <b>f2-Xe</b> | 13.62               | <b>F2-Xe</b> | 4.61                |
| <b>f3-Xe</b> | 19.41               | <b>F3-Xe</b> | 4.30                |
| <b>f4-Xe</b> | 17.72               |              |                     |

Cartesian coordinates of the optimized isomeric structures and transition states.

#####

**HBO<sub>2</sub>** charge=0 spin=1  
O 0.14626400 1.32369700 0.00000000  
B 0.00000000 0.12325600 0.00000000  
O -0.21501600 -1.18140900 0.00000000  
H 0.55002000 -1.75458300 0.00000000

#####

**i-Xe** charge=0 spin=1  
O -0.68967800 -3.36651100 0.00000000  
B 0.01756300 -2.36472600 0.00000000  
O 0.73709800 -1.29206300 0.00000000  
H -0.46717000 2.44491800 0.00000000  
Xe 0.00000000 0.86383900 0.00000000

#####

**i-Xe-TS** charge=0 spin=1  
O -0.68967800 -3.36651100 0.00000000  
B 0.01756300 -2.36472600 0.00000000  
O 0.73709800 -1.29206300 0.00000000  
H -0.46717000 2.44491800 0.00000000  
Xe 0.00000000 0.86383900 0.00000000

#####

**ii-Xe** charge=0 spin=1  
O -0.02122400 -3.18866900 0.00000000  
B -0.03287400 -1.98943000 0.00000000  
O -0.06073300 2.38362800 0.00000000  
H 0.82002200 2.76256500 0.00000000  
Xe 0.00000000 0.25231300 0.00000000

#####

**iii-Xe** charge=0 spin=1  
O 2.46534600 -0.04478500 0.02082100  
B -2.71998800 0.02789200 -0.01415900  
O -4.00662400 0.06504500 0.01560000  
H -4.60988600 -0.67975400 -0.00416700  
Xe 0.56555600 0.00700400 -0.00400800

#####

**LiBO<sub>2</sub>** charge=0 spin=1  
O 0.00000000 0.00000000 1.61299800  
B 0.00000000 0.00000000 0.38490000  
O 0.00000000 0.00000000 -0.89736200  
Li 0.00000000 0.00000000 -2.54986200

#####

**I-Xe** charge=0 spin=1  
O 0.00000000 0.00000000 -3.00168600

|    |            |            |             |
|----|------------|------------|-------------|
| B  | 0.00000000 | 0.00000000 | -4.28295900 |
| O  | 0.00000000 | 0.00000000 | -5.51187100 |
| Li | 0.00000000 | 0.00000000 | -1.34077800 |
| Xe | 0.00000000 | 0.00000000 | 1.73232600  |

#####

**II-Xe** charge=0 spin=1

|    |            |            |             |
|----|------------|------------|-------------|
| O  | 0.00000000 | 0.00000000 | -3.36863800 |
| B  | 0.00000000 | 0.00000000 | -2.16333400 |
| O  | 0.00000000 | 0.00000000 | 2.17924200  |
| Li | 0.00000000 | 0.00000000 | 3.80336200  |
| Xe | 0.00000000 | 0.00000000 | 0.16521800  |

#####

**III-Xe** charge=0 spin=1

|    |             |             |             |
|----|-------------|-------------|-------------|
| O  | -2.57775700 | 0.04856300  | 0.00268200  |
| B  | 2.39777000  | -0.05332500 | -0.00184300 |
| O  | 3.64358000  | -0.02114000 | 0.00354600  |
| Li | 5.33059400  | 0.12702100  | -0.00296500 |
| Xe | -0.67606000 | -0.00618200 | -0.00058700 |

#####

**i-Ar** charge=0 spin=1

|    |             |             |            |
|----|-------------|-------------|------------|
| O  | 2.46694400  | 0.45810300  | 0.00000000 |
| B  | 1.26679100  | 0.73023100  | 0.00000000 |
| O  | 0.00000000  | 0.95862300  | 0.00000000 |
| H  | -2.18394300 | -1.73163100 | 0.00000000 |
| Ar | -1.32697600 | -0.73629600 | 0.00000000 |

#####

**i-Ar-TS** charge=0 spin=1

|    |             |             |             |
|----|-------------|-------------|-------------|
| O  | -2.98958600 | -0.03882200 | -0.02459800 |
| B  | -1.75398500 | 0.02174400  | 0.00910300  |
| O  | -0.47978000 | 0.08427100  | 0.04081500  |
| H  | 2.33724500  | 1.10230200  | -0.04326600 |
| Ar | 1.89931200  | -0.08747900 | -0.00733300 |

#####

**ii-Ar** charge=0 spin=1

|    |             |             |            |
|----|-------------|-------------|------------|
| O  | -0.01217400 | -2.71325600 | 0.00000000 |
| B  | -0.02943300 | -1.51765700 | 0.00000000 |
| O  | -0.07395200 | 2.41124200  | 0.00000000 |
| H  | 0.83617200  | 2.71851000  | 0.00000000 |
| Ar | 0.00000000  | 0.40477100  | 0.00000000 |

#####

**iii-Ar** charge=0 spin=1

|   |             |             |            |
|---|-------------|-------------|------------|
| O | 0.03246600  | 2.84791900  | 0.00000000 |
| B | -0.01496600 | -2.18347500 | 0.00000000 |
| O | -0.10200100 | -3.47125300 | 0.00000000 |



|                |             |             |             |
|----------------|-------------|-------------|-------------|
| H              | 0.63110600  | -4.08925000 | 0.00000000  |
| Ar             | 0.00000000  | 1.11073900  | 0.00000000  |
| #####          |             |             |             |
| <b>I-Ar</b>    | charge=0    | spin=1      |             |
| O              | 0.00000000  | 0.00000000  | -1.37451800 |
| B              | 0.00000000  | 0.00000000  | -2.65613700 |
| O              | 0.00000000  | 0.00000000  | -3.88464400 |
| Li             | 0.00000000  | 0.00000000  | 0.28276100  |
| Ar             | 0.00000000  | 0.00000000  | 3.02809500  |
| #####          |             |             |             |
| <b>II-Ar</b>   | charge=0    | spin=1      |             |
| O              | 0.00000000  | 0.00000000  | -2.99933500 |
| B              | 0.00000000  | 0.00000000  | -1.79605800 |
| O              | 0.00000000  | 0.00000000  | 2.12519500  |
| Li             | 0.00000000  | 0.00000000  | 3.74375400  |
| Ar             | 0.00000000  | 0.00000000  | 0.26345200  |
| #####          |             |             |             |
| <b>III-Ar</b>  | charge=0    | spin=1      |             |
| O              | 0.05071400  | 3.02964700  | 0.00000000  |
| B              | -0.06064700 | -1.80008700 | 0.00000000  |
| O              | -0.04723000 | -3.04913300 | 0.00000000  |
| Li             | 0.09178800  | -4.73166300 | 0.00000000  |
| Ar             | 0.00000000  | 1.29729500  | 0.00000000  |
| #####          |             |             |             |
| <b>i-Kr</b>    | charge=0    | spin=1      |             |
| O              | -0.75983100 | -2.94691200 | 0.00000000  |
| B              | 0.02134500  | -1.99849600 | 0.00000000  |
| O              | 0.80532000  | -0.97453300 | 0.00000000  |
| H              | -0.47064100 | 2.46578300  | 0.00000000  |
| Kr             | 0.00000000  | 1.08050700  | 0.00000000  |
| #####          |             |             |             |
| <b>i-Kr-TS</b> | charge=0    | spin=1      |             |
| O              | -0.06407700 | 3.64975600  | 0.00000000  |
| B              | -0.03387700 | 2.41290800  | 0.00000000  |
| O              | 0.00000000  | 1.13626500  | 0.00000000  |
| H              | 1.36398600  | -1.63502800 | 0.00000000  |
| Kr             | -0.01894400 | -1.35326900 | 0.00000000  |
| #####          |             |             |             |
| <b>ii-Kr</b>   | charge=0    | spin=1      |             |
| O              | -0.01183800 | -2.95706100 | 0.00000000  |
| B              | -0.02672000 | -1.75981200 | 0.00000000  |
| O              | -0.07457800 | 2.36150500  | 0.00000000  |
| H              | 0.82493000  | 2.69684700  | 0.00000000  |
| Kr             | 0.00000000  | 0.30185200  | 0.00000000  |

#####

**iii-Kr** charge=0 spin=1  
O 0.01993400 2.56177400 0.00000000  
B -0.01112800 -2.52114000 0.00000000  
O -0.09263900 -3.80775000 0.00000000  
H 0.63727800 -4.42939200 0.00000000  
Kr 0.00000000 0.75008000 0.00000000

#####

**I-Kr** charge=0 spin=1  
O 0.00000000 0.00000000 -2.36625600  
B 0.00000000 0.00000000 -3.64773800  
O 0.00000000 0.00000000 -4.87641800  
Li 0.00000000 0.00000000 -0.70771400  
Kr 0.00000000 0.00000000 2.17509000

#####

**II-Kr** charge=0 spin=1  
O 0.00000000 0.00000000 -3.17828900  
B 0.00000000 0.00000000 -1.97404000  
O 0.00000000 0.00000000 2.12157500  
Li 0.00000000 0.00000000 3.74087500  
Kr 0.00000000 0.00000000 0.19725800

#####

**III-Kr** charge=0 spin=1  
O 0.04215300 2.70922500 0.00000000  
B -0.04998800 -2.20093800 0.00000000  
O -0.03943200 -3.44882200 0.00000000  
Li 0.07605700 -5.13531400 0.00000000  
Kr 0.00000000 0.89798400 0.00000000

#####

**a1** charge=0 spin=1  
Cu 0.00000000 1.10224400 0.00000000  
O -1.82048600 0.54013600 0.00000000  
O 1.85346400 0.49726300 0.00000000  
B 1.57579000 -0.72213200 0.00000000  
B -1.60999500 -0.71561300 0.00000000  
O 1.23103100 -1.95471400 0.00000000  
O -1.26558700 -1.91910200 0.00000000  
H 0.18364700 -2.08500600 0.00000000

#####

**a2** charge=0 spin=1  
Cu 0.00000000 0.36496700 0.00000000  
O -1.56006300 -0.67838800 0.00000000  
O 1.48190300 1.39718800 0.00000000  
B 2.73010900 1.07736200 0.00000000

|   |             |             |            |
|---|-------------|-------------|------------|
| B | -2.50023700 | -1.44648900 | 0.00000000 |
| O | 3.92414000  | 0.79290800  | 0.00000000 |
| O | -3.55520500 | -2.20863900 | 0.00000000 |
| H | -3.47555400 | -3.16295900 | 0.00000000 |

#####

|           |             |             |            |
|-----------|-------------|-------------|------------|
| <b>a3</b> | charge=0    | spin=1      |            |
| O         | 0.27822300  | -1.87863300 | 0.00000000 |
| O         | -0.26886100 | 1.85020100  | 0.00000000 |
| B         | 0.61309200  | 2.79580900  | 0.00000000 |
| B         | -0.68435400 | -2.81953100 | 0.00000000 |
| O         | 1.44081600  | 3.69840300  | 0.00000000 |
| O         | -1.55438000 | -3.64587800 | 0.00000000 |
| H         | 1.18992700  | -2.18383800 | 0.00000000 |
| Cu        | 0.00000000  | 0.07274800  | 0.00000000 |

#####

|           |            |             |             |
|-----------|------------|-------------|-------------|
| <b>a4</b> | charge=0   | spin=1      |             |
| Cu        | 0.00000000 | 0.00000000  | 0.41773500  |
| O         | 0.00000000 | 1.74008000  | 0.54475700  |
| O         | 0.00000000 | -1.74008000 | 0.54475700  |
| B         | 0.00000000 | -2.74546000 | -0.29558200 |
| B         | 0.00000000 | 2.74546000  | -0.29558200 |
| O         | 0.00000000 | -3.69158700 | -1.05499800 |
| O         | 0.00000000 | 3.69158700  | -1.05499800 |
| H         | 0.00000000 | 0.00000000  | -0.99463400 |

#####

|           |             |             |            |
|-----------|-------------|-------------|------------|
| <b>b1</b> | charge=0    | spin=1      |            |
| Ag        | 0.00000000  | 1.08821500  | 0.00000000 |
| O         | 1.96696000  | -0.00513600 | 0.00000000 |
| O         | -1.95235800 | 0.10164500  | 0.00000000 |
| B         | -1.65253900 | -1.12612000 | 0.00000000 |
| B         | 1.63682600  | -1.20348700 | 0.00000000 |
| O         | -1.24083500 | -2.31151100 | 0.00000000 |
| O         | 1.21715900  | -2.41135700 | 0.00000000 |
| H         | 0.15115800  | -2.48717500 | 0.00000000 |

#####

|           |             |             |             |
|-----------|-------------|-------------|-------------|
| <b>b2</b> | charge=0    | spin=1      |             |
| Ag        | 0.16214700  | -0.29139900 | -0.02251500 |
| O         | -1.97222000 | -0.01109900 | -0.10843200 |
| O         | 2.16176200  | -0.58665400 | 0.16517800  |
| B         | 3.05964900  | 0.33100600  | 0.05304300  |
| B         | -3.14437100 | 0.29326300  | -0.01772900 |
| O         | 3.92338200  | 1.19894700  | -0.05099000 |
| O         | -4.41904000 | 0.56187300  | 0.03117700  |
| H         | -4.74839000 | 1.26986700  | 0.58618400  |

#####

**b3** charge=0 spin=1  
Ag 0.0000000 0.13185500 0.00000000  
O 0.86973200 -1.97590200 0.00000000  
O -0.87154000 1.95822400 0.00000000  
B -2.15159500 2.13708000 0.00000000  
B 2.16315000 -2.33094500 0.00000000  
O -3.36646600 2.30587500 0.00000000  
O 3.33285300 -2.60568100 0.00000000  
H 0.22559400 -2.68797300 0.00000000

#####

**b4** charge=0 spin=1  
Ag 0.0000000 0.0000000 0.38228200  
O -0.19259600 -1.92108500 0.49600700  
O 0.19259600 1.92108500 0.49600700  
B 0.09197900 2.84076500 -0.43040100  
B -0.09197900 -2.84076500 -0.43040100  
O 0.00000000 3.70518000 -1.27940300  
O 0.00000000 -3.70518000 -1.27940300  
H 0.00000000 0.00000000 -1.12889100

#####

**c1** charge=0 spin=1  
O -1.31676800 -2.34465100 0.00000000  
O -2.01568700 0.08957300 0.00000000  
O 2.08907200 0.10538100 0.00000000  
O 1.26445400 -2.30492300 0.00000000  
B -1.71824800 -1.16539500 0.00000000  
B 1.63422500 -1.07165700 0.00000000  
Au 0.00000000 0.62385500 0.00000000  
H 0.25153600 -2.46236500 0.00000000

#####

**c2** charge=0 spin=1  
O -3.79009500 1.26309300 -0.05441600  
O -2.04851100 -0.54078100 0.21096200  
O 1.91519300 0.09416200 -0.21075500  
O 4.36008900 0.59510100 0.08604700  
B -2.92899700 0.40244600 0.06868600  
B 3.08565700 0.36092100 -0.03507800  
Au -0.11344800 -0.20668000 -0.01467300  
H 4.68566700 1.21827100 0.73642000

#####

**c3** charge=0 spin=1  
O 3.98533800 -0.60983700 0.64760800  
O 1.95873300 0.77045200 -0.03570100

|              |             |             |             |
|--------------|-------------|-------------|-------------|
| O            | -1.86881500 | -0.74255700 | -0.31799600 |
| O            | -3.83425700 | 0.33840600  | 0.84041700  |
| B            | 3.03206700  | 0.04457200  | 0.32598200  |
| B            | -2.87350400 | -0.17357600 | 0.28850000  |
| Au           | -0.06091000 | 0.01143100  | -0.15023000 |
| H            | 2.09112500  | 1.69022700  | -0.27885400 |
| #####        |             |             |             |
| <b>c4</b>    | charge=0    | spin=1      |             |
| O            | 3.69567200  | 1.32835800  | -0.17058900 |
| O            | 1.93023900  | -0.43494700 | 0.22137300  |
| O            | -1.91506700 | -0.40857900 | -0.27755500 |
| O            | -3.73266300 | 1.29680700  | 0.12526400  |
| B            | 2.84124000  | 0.48584000  | 0.01331500  |
| B            | -2.85386500 | 0.48141000  | -0.06641200 |
| Au           | 0.00358500  | -0.25616600 | 0.00660800  |
| H            | -0.04555400 | 1.14774000  | 0.55550500  |
| #####        |             |             |             |
| <b>d1-Xe</b> | charge=0    | spin=1      |             |
| Cu           | 1.83016700  | -0.28700800 | 0.04606600  |
| O            | -3.84079900 | 0.22349700  | -0.01679100 |
| O            | 3.63793400  | -0.39646900 | 0.14836700  |
| B            | 4.55820900  | 0.50134500  | 0.04349800  |
| B            | -5.04112800 | 0.37782200  | 0.04943600  |
| O            | 5.44524900  | 1.34230800  | -0.05414700 |
| O            | -6.35050100 | 0.48296100  | 0.12981300  |
| H            | -6.74646000 | 1.35004600  | 0.05168800  |
| Xe           | -0.64905300 | -0.19705600 | -0.06500400 |
| #####        |             |             |             |
| <b>d2-Xe</b> | charge=0    | spin=1      |             |
| Cu           | -1.45064500 | -0.07602700 | 0.00673300  |
| O            | -3.33720700 | 0.15960100  | 0.01008900  |
| O            | 3.59942400  | -0.52216700 | -0.01099900 |
| B            | 4.37738700  | 0.48605000  | -0.00441700 |
| B            | -4.53820200 | 0.36048700  | -0.00266900 |
| O            | 5.10004200  | 1.49660200  | 0.00226400  |
| O            | -5.82785300 | 0.49214200  | -0.01919100 |
| H            | -6.25598900 | 1.34882600  | 0.00896500  |
| Xe           | 0.97876900  | -0.30344700 | -0.00048400 |
| #####        |             |             |             |
| <b>d3-Xe</b> | charge=0    | spin=1      |             |
| B            | 1.47885300  | 4.01157900  | 0.00000000  |
| O            | 2.64109600  | 4.44336300  | 0.00000000  |
| O            | 0.30377100  | 3.51347200  | 0.00000000  |
| B            | -1.29473400 | -4.27762700 | 0.00000000  |

|    |             |             |            |
|----|-------------|-------------|------------|
| O  | -0.19598500 | -3.49454700 | 0.00000000 |
| O  | -2.29570700 | -4.93749900 | 0.00000000 |
| Xe | 0.00000000  | 0.95865000  | 0.00000000 |
| H  | 0.65349100  | -3.94673000 | 0.00000000 |
| Cu | -0.17929300 | -1.47201400 | 0.00000000 |

#####

**e1-Xe** charge=0 spin=1

|    |             |             |             |
|----|-------------|-------------|-------------|
| Ag | 1.69259000  | -0.25146600 | 0.05291200  |
| O  | -4.23012400 | 0.32075600  | 0.06346000  |
| O  | 3.68876100  | -0.52886900 | 0.33706000  |
| B  | 4.61628400  | 0.35780900  | 0.20596800  |
| B  | -5.42483000 | 0.22295000  | 0.24162000  |
| O  | 5.50510600  | 1.19589900  | 0.08313300  |
| O  | -6.71276100 | 0.05427000  | 0.45525900  |
| H  | -7.30723000 | 0.78026700  | 0.27050700  |
| Xe | 1.00388100  | -0.00373300 | -0.23160400 |

#####

**e2-Xe** charge=0 spin=1

|    |             |             |            |
|----|-------------|-------------|------------|
| Ag | 0.00000000  | 1.32373600  | 0.00000000 |
| O  | 0.43940400  | 3.45532000  | 0.00000000 |
| O  | -0.74480900 | -3.89562300 | 0.00000000 |
| B  | 0.27717000  | -4.65624100 | 0.00000000 |
| B  | 0.70283900  | 4.64349600  | 0.00000000 |
| O  | 1.30193900  | -5.35826600 | 0.00000000 |
| O  | 0.90511700  | 5.92736900  | 0.00000000 |
| H  | 1.78810600  | 6.29848500  | 0.00000000 |
| Xe | -0.40558100 | -1.28668000 | 0.00000000 |

#####

**e3-Xe** charge=0 spin=1

|    |             |             |            |
|----|-------------|-------------|------------|
| Ag | -0.15436700 | -1.34002600 | 0.00000000 |
| O  | -0.08353400 | -3.69324200 | 0.00000000 |
| O  | 0.24280400  | 3.86081100  | 0.00000000 |
| B  | 1.42731500  | 4.33863500  | 0.00000000 |
| B  | -1.14197900 | -4.52007800 | 0.00000000 |
| O  | 2.59643300  | 4.74956100  | 0.00000000 |
| O  | -2.12497000 | -5.20990000 | 0.00000000 |
| H  | 0.78269300  | -4.10906000 | 0.00000000 |
| Xe | 0.00000000  | 1.30258600  | 0.00000000 |

#####

**f1-Xe** charge=0 spin=1

|   |             |             |             |
|---|-------------|-------------|-------------|
| O | 4.98609300  | 1.38746800  | 0.06672400  |
| O | 3.29814200  | -0.47309000 | 0.28351200  |
| O | -4.38260500 | 0.28856200  | -0.02327100 |
| O | -6.84813400 | 0.17830300  | 0.51936100  |

|    |             |             |             |
|----|-------------|-------------|-------------|
| B  | 4.15329100  | 0.49746700  | 0.16815100  |
| B  | -5.57171200 | 0.24344200  | 0.20764900  |
| Au | 1.33450300  | -0.20994600 | 0.03918700  |
| H  | -7.49780700 | 0.33750900  | -0.16417500 |
| Xe | -1.24562600 | 0.02766200  | -0.21446700 |

#####

**f2-Xe** charge=0 spin=1

|    |             |             |            |
|----|-------------|-------------|------------|
| O  | 1.19108300  | -5.61611900 | 0.00000000 |
| O  | -0.71602500 | -3.97487900 | 0.00000000 |
| O  | 0.31859400  | 3.15599800  | 0.00000000 |
| O  | 0.78968200  | 5.62459900  | 0.00000000 |
| B  | 0.24072300  | -4.82276300 | 0.00000000 |
| B  | 0.58546100  | 4.34206800  | 0.00000000 |
| Au | 0.00000000  | 1.05333100  | 0.00000000 |
| H  | 1.67327500  | 5.99459000  | 0.00000000 |
| Xe | -0.34205300 | -1.48742600 | 0.00000000 |

#####

**f3-Xe** charge=0 spin=1

|    |             |             |            |
|----|-------------|-------------|------------|
| O  | -2.03927000 | 4.83741500  | 0.00000000 |
| O  | 0.03398500  | 3.36173400  | 0.00000000 |
| O  | -0.08230400 | -3.92202500 | 0.00000000 |
| O  | 2.07924600  | -5.21198600 | 0.00000000 |
| B  | -1.04970800 | 4.15793300  | 0.00000000 |
| B  | 1.00932800  | -4.59808800 | 0.00000000 |
| Au | 0.00000000  | 1.08848500  | 0.00000000 |
| H  | 0.89568100  | 3.78706700  | 0.00000000 |
| Xe | -0.01161200 | -1.48329000 | 0.00000000 |

#####

**f4-Xe** charge=0 spin=1

|    |             |             |            |
|----|-------------|-------------|------------|
| O  | 3.91457100  | -0.15724700 | 0.00000000 |
| O  | 1.39832800  | -0.31768900 | 0.00000000 |
| O  | -1.46149600 | 2.55003400  | 0.00000000 |
| O  | -3.77214600 | 1.53291200  | 0.00000000 |
| B  | 2.69824800  | -0.18719600 | 0.00000000 |
| B  | -2.65059600 | 2.02838600  | 0.00000000 |
| Au | 0.00000000  | 1.19665300  | 0.00000000 |
| H  | -0.93912500 | -3.70194400 | 0.00000000 |
| Xe | 0.00123700  | -2.38710500 | 0.00000000 |

#####

**A1** charge=0 spin=1

|    |            |             |             |
|----|------------|-------------|-------------|
| Cu | 0.00000000 | 0.00000000  | 1.10215400  |
| O  | 0.00000000 | 1.84758000  | 0.68553200  |
| O  | 0.00000000 | -1.84758000 | 0.68553200  |
| B  | 0.00000000 | -1.78717800 | -0.58257900 |

|           |             |             |             |
|-----------|-------------|-------------|-------------|
| B         | 0.00000000  | 1.78717800  | -0.58257900 |
| O         | 0.00000000  | -1.64983500 | -1.82698900 |
| O         | 0.00000000  | 1.64983500  | -1.82698900 |
| Li        | 0.00000000  | 0.00000000  | -2.62445000 |
| #####     |             |             |             |
| <b>A2</b> | charge=0    | spin=1      |             |
| Cu        | 0.00000000  | 0.84799200  | 0.00000000  |
| O         | -1.88202300 | 1.34800600  | 0.00000000  |
| O         | 0.95333400  | -0.81844900 | 0.00000000  |
| B         | 2.24112000  | -1.00237600 | 0.00000000  |
| B         | -2.18921800 | 0.11549800  | 0.00000000  |
| O         | 3.44333100  | -1.20420500 | 0.00000000  |
| O         | -2.31443500 | -1.13450100 | 0.00000000  |
| Li        | -0.62039000 | -1.89473200 | 0.00000000  |
| #####     |             |             |             |
| <b>A3</b> | charge=0    | spin=1      |             |
| Cu        | 0.00000000  | 0.00000000  | 0.80823300  |
| O         | 0.00000000  | 1.44101100  | -0.56132300 |
| O         | 0.00000000  | -1.44101100 | -0.56132300 |
| B         | 0.00000000  | -2.73186600 | -0.42882400 |
| B         | 0.00000000  | 2.73186600  | -0.42882400 |
| O         | 0.00000000  | -3.94654000 | -0.31204900 |
| O         | 0.00000000  | 3.94654000  | -0.31204900 |
| Li        | 0.00000000  | 0.00000000  | -1.72551900 |
| #####     |             |             |             |
| <b>B1</b> | charge=0    | spin=1      |             |
| Ag        | 0.00000000  | 0.00000000  | 1.02212300  |
| O         | 0.00000000  | 2.04704200  | 0.31092600  |
| O         | 0.00000000  | -2.04704200 | 0.31092600  |
| B         | 0.00000000  | -1.88768300 | -0.94251400 |
| B         | 0.00000000  | 1.88768300  | -0.94251400 |
| O         | 0.00000000  | -1.65030700 | -2.17354700 |
| O         | 0.00000000  | 1.65030700  | -2.17354700 |
| Li        | 0.00000000  | 0.00000000  | -2.93756400 |
| #####     |             |             |             |
| <b>B2</b> | charge=0    | spin=1      |             |
| Ag        | 0.00000000  | 0.87502700  | 0.00000000  |
| O         | 1.01264500  | -1.11692300 | 0.00000000  |
| O         | -2.22248800 | 0.80310900  | 0.00000000  |
| B         | -2.28008700 | -0.45789800 | 0.00000000  |
| B         | 2.30771600  | -1.18377900 | 0.00000000  |
| O         | -2.17359400 | -1.70992400 | 0.00000000  |
| O         | 3.52842700  | -1.24060900 | 0.00000000  |
| Li        | -0.43268900 | -2.26771300 | 0.00000000  |



#####

**B3** charge=0 spin=1  
Ag 0.0000000 0.0000000 0.83319600  
O 0.0000000 1.46027100 -0.90585800  
O 0.0000000 -1.46027100 -0.90585800  
B 0.0000000 -2.74977600 -0.79293000  
B 0.0000000 2.74977600 -0.79293000  
O 0.0000000 -3.96638600 -0.67327100  
O 0.0000000 3.96638600 -0.67327100  
Li 0.0000000 0.0000000 -1.98828500

#####

**C1** charge=0 spin=1  
O 0.0000000 1.73383700 -2.20355800  
O 0.0000000 2.05419000 0.30659000  
O 0.0000000 -2.05419000 0.30659000  
O 0.0000000 -1.73383700 -2.20355800  
B 0.0000000 1.92173900 -0.96695400  
B 0.0000000 -1.92173900 -0.96695400  
Au 0.0000000 0.0000000 0.61529600  
Li 0.0000000 0.0000000 -2.86243800

#####

**C2** charge=0 spin=1  
O -2.39851600 -1.41108300 0.00000000  
O -2.06735900 1.10347400 0.00000000  
O 1.08064800 -1.31191900 0.00000000  
O 3.58629700 -1.59258100 0.00000000  
B -2.29468000 -0.15835200 0.00000000  
B 2.37791200 -1.44141500 0.00000000  
Au 0.00000000 0.51028000 0.00000000  
Li -0.67490500 -2.20546300 0.00000000

#####

**C3** charge=0 spin=1  
B -2.61939700 1.13327800 0.00000000  
O -3.77453600 0.72914300 0.00000000  
O -1.38938600 1.55587300 0.00000000  
B 2.62732500 -1.27704500 0.00000000  
O 1.32932200 -1.44420500 0.00000000  
O 3.83789800 -1.18275600 0.00000000  
Au 0.00000000 0.14253700 0.00000000  
Li -0.02200900 -2.60201900 0.00000000

#####

**C4** charge=0 spin=1  
O 0.00000000 3.95513800 -0.81662200  
O 0.00000000 1.45636600 -1.13496100

|    |            |             |             |
|----|------------|-------------|-------------|
| O  | 0.00000000 | -1.45636600 | -1.13496100 |
| O  | 0.00000000 | -3.95513800 | -0.81662200 |
| B  | 0.00000000 | 2.74432800  | -0.96990300 |
| B  | 0.00000000 | -2.74432800 | -0.96990300 |
| Au | 0.00000000 | 0.00000000  | 0.60312200  |
| Li | 0.00000000 | 0.00000000  | -2.24077400 |

#####

**D1-Xe** charge=0 spin=1

|    |             |             |             |
|----|-------------|-------------|-------------|
| Cu | 1.91778300  | -0.27552300 | 0.05458900  |
| O  | 3.72933700  | -0.38464200 | 0.15024500  |
| O  | -3.55656700 | 0.11531900  | -0.17406600 |
| B  | -4.76866100 | 0.28797400  | -0.03162800 |
| B  | 4.66193800  | 0.49740300  | 0.03975900  |
| O  | -6.02170600 | 0.46722500  | 0.11795400  |
| O  | 5.56489200  | 1.32218600  | -0.06245700 |
| Li | -7.65491700 | 0.72643200  | 0.31570500  |
| Xe | -0.55268500 | -0.19031000 | -0.05230100 |

#####

**D2-Xe** charge=0 spin=1

|    |             |             |             |
|----|-------------|-------------|-------------|
| Cu | -1.35734500 | -0.10926300 | -0.12108600 |
| O  | 3.74024400  | -0.45725500 | 0.25845300  |
| O  | -3.21150300 | 0.04329100  | -0.19717200 |
| B  | -4.41790800 | 0.26510500  | -0.01052900 |
| B  | 4.58821800  | 0.47437000  | 0.08587800  |
| O  | -5.64182800 | 0.48373400  | 0.16779300  |
| O  | 5.39308800  | 1.40705900  | -0.08943500 |
| Li | -7.29314000 | 0.80107800  | 0.41851800  |
| Xe | 1.07686800  | -0.27308500 | 0.01411300  |

#####

**E1-Xe** charge=0 spin=1

|    |             |             |             |
|----|-------------|-------------|-------------|
| Ag | 1.77948300  | -0.22163500 | 0.06724000  |
| O  | -3.94787700 | 0.13044400  | -0.03596000 |
| O  | 3.78953200  | -0.44228900 | 0.33533500  |
| B  | 4.70636100  | 0.43927200  | 0.12919800  |
| B  | -5.16857900 | 0.23132800  | 0.09931000  |
| O  | 5.58915400  | 1.27205900  | -0.06311800 |
| O  | -6.43135400 | 0.33672500  | 0.24081200  |
| Li | -8.07538800 | 0.50503700  | 0.44509100  |
| Xe | -0.90915000 | -0.08938500 | -0.17508700 |

#####

**E2-Xe** charge=0 spin=1

|    |             |             |             |
|----|-------------|-------------|-------------|
| Ag | -1.24187400 | -0.49606600 | -0.03500700 |
| O  | -3.35849300 | -0.29360500 | -0.04589600 |
| O  | 4.06533900  | 0.03253800  | 0.13520000  |

|    |             |             |             |
|----|-------------|-------------|-------------|
| B  | 4.34795600  | 1.26525400  | 0.00948300  |
| B  | -4.24441000 | 0.57950300  | 0.00517700  |
| O  | 4.56454500  | 2.48506800  | -0.11812500 |
| O  | -5.15005700 | 1.45036800  | 0.05592900  |
| Li | -6.27484600 | 2.72009000  | 0.13251600  |
| Xe | 1.40193000  | -0.43451600 | 0.01773400  |

#####

**F1-Xe** charge=0 spin=1

|    |             |             |             |
|----|-------------|-------------|-------------|
| O  | 6.58271200  | 0.10810900  | 0.31779800  |
| O  | 4.12148300  | 0.35311400  | -0.09044600 |
| O  | -3.37089000 | -0.50669300 | 0.24641900  |
| O  | -5.10042900 | 1.32420500  | 0.14923100  |
| B  | 5.33213900  | 0.23379900  | 0.10966100  |
| B  | -4.24524500 | 0.44921500  | 0.19283700  |
| Au | -1.40427100 | -0.21414500 | 0.02407200  |
| Li | 8.21722900  | -0.05861800 | 0.59648200  |
| Xe | 1.16644900  | 0.06385800  | -0.18866100 |

#####

**F2-Xe** charge=0 spin=1

|    |             |             |             |
|----|-------------|-------------|-------------|
| O  | 4.09415500  | -0.06382000 | -0.00056300 |
| O  | -3.12583600 | -0.32261600 | 0.00036400  |
| B  | -3.84264900 | 0.70337800  | -0.00003800 |
| B  | 4.62300700  | 1.09608800  | 0.00003900  |
| O  | -4.58375500 | 1.71446700  | -0.00043800 |
| O  | 5.09666700  | 2.24362800  | 0.00064100  |
| Li | -5.36603900 | 3.22843600  | -0.00040200 |
| Xe | 1.52680600  | -0.31428000 | -0.00015600 |
| Au | -1.03925400 | -0.38335200 | 0.00012100  |

#####

**F3-Xe** charge=0 spin=1

|    |             |             |             |
|----|-------------|-------------|-------------|
| B  | 4.64129900  | 0.35999000  | -0.00002200 |
| O  | 5.23779600  | 1.44497400  | -0.00002000 |
| O  | 3.96473100  | -0.72500600 | -0.00001300 |
| B  | -4.04210900 | -0.07967400 | -0.00000800 |
| O  | -3.06512400 | 0.79519700  | 0.00001300  |
| O  | -4.97874600 | -0.85088200 | -0.00003900 |
| Au | -1.05198600 | 0.09769500  | 0.00000300  |
| Li | -2.80812900 | 2.54145100  | -0.00000400 |
| Xe | 1.46789000  | -0.40848300 | 0.00000700  |

#####

**d1-Ar** charge=0 spin=1

|    |             |             |             |
|----|-------------|-------------|-------------|
| Cu | -1.42699200 | -0.36040300 | -0.00340800 |
| O  | 3.81836200  | 0.10738500  | 0.05478200  |
| O  | -3.22942100 | -0.46665300 | -0.04196400 |

|              |             |             |             |
|--------------|-------------|-------------|-------------|
| B            | -4.12749300 | 0.46118600  | -0.01727000 |
| B            | 5.01499300  | 0.28669500  | -0.00506800 |
| O            | -4.99332600 | 1.32796300  | 0.00568200  |
| O            | 6.32171000  | 0.42527300  | -0.09630900 |
| H            | 6.71634200  | 1.23795800  | 0.21745200  |
| Ar           | 0.82724100  | -0.31541300 | 0.03419700  |
| #####        |             |             |             |
| <b>e1-Ar</b> | charge=0    | spin=1      |             |
| Ag           | -1.28299100 | -0.24172500 | 0.00464300  |
| O            | 4.36392900  | 0.13151500  | 0.03298900  |
| O            | -3.27906800 | -0.51748700 | -0.27445500 |
| B            | -4.19337000 | 0.38053800  | -0.11680500 |
| B            | 5.56795700  | 0.21111100  | -0.07204300 |
| O            | -5.06775800 | 1.22868200  | 0.03066500  |
| O            | 6.88217300  | 0.23988700  | -0.16696800 |
| H            | 7.29714900  | 1.04489600  | -0.47399200 |
| Ar           | 1.27423700  | -0.07238100 | 0.23456500  |
| #####        |             |             |             |
| <b>f1-Ar</b> | charge=0    | spin=1      |             |
| O            | 4.52827300  | 1.47063600  | -0.02199600 |
| O            | 2.90737400  | -0.44774200 | 0.22197400  |
| O            | -4.46691100 | 0.13710700  | -0.13747900 |
| O            | -6.93931400 | 0.39090900  | 0.32367900  |
| B            | 3.72738100  | 0.55546900  | 0.09193000  |
| B            | -5.65623900 | 0.26489900  | 0.05403700  |
| Au           | 0.95317300  | -0.20733500 | 0.00282900  |
| H            | -7.53637600 | 0.60914700  | -0.39071800 |
| Ar           | -1.46418800 | -0.04104600 | -0.20289200 |
| #####        |             |             |             |
| <b>D1-Ar</b> | charge=0    | spin=1      |             |
| Cu           | 1.55794900  | -0.43247700 | -0.00065000 |
| O            | 3.36104200  | -0.28924700 | 0.00015600  |
| O            | -3.51289200 | -0.28347300 | 0.00535300  |
| B            | -4.63959900 | 0.21351100  | 0.00231100  |
| B            | 4.13054300  | 0.74641100  | 0.00058900  |
| O            | -5.80582900 | 0.73230500  | -0.00086500 |
| O            | 4.87891000  | 1.71768500  | 0.00099000  |
| Li           | -7.30251600 | 1.45954900  | -0.00557400 |
| Ar           | -0.67208500 | -0.64747600 | -0.00133400 |
| #####        |             |             |             |
| <b>E1-Ar</b> | charge=0    | spin=1      |             |
| Ag           | -1.39277700 | -0.23227900 | -0.00679900 |
| O            | 4.04739700  | -0.00891400 | 0.11358200  |
| O            | -3.39332500 | -0.48808700 | -0.28800700 |

|    |             |             |             |
|----|-------------|-------------|-------------|
| B  | -4.31117000 | 0.40124300  | -0.11260600 |
| B  | 5.26079000  | 0.15139500  | -0.01781600 |
| O  | -5.19277200 | 1.24008100  | 0.05081000  |
| O  | 6.51936200  | 0.31918400  | -0.15557600 |
| Li | 8.15245600  | 0.55849000  | -0.34714500 |
| Ar | 1.13387600  | -0.11220400 | 0.23592500  |

#####

**F1-Ar** charge=0 spin=1

|    |             |             |             |
|----|-------------|-------------|-------------|
| O  | 6.66160000  | 0.35140800  | 0.14345600  |
| O  | 4.18915200  | 0.05547000  | -0.15310600 |
| O  | -3.00563300 | -0.42829400 | 0.23216800  |
| O  | -4.63732900 | 1.47600400  | -0.03983400 |
| B  | 5.40331700  | 0.20007800  | -0.00839300 |
| B  | -3.82900400 | 0.56784500  | 0.08705900  |
| Au | -1.04787900 | -0.20356000 | 0.00817000  |
| Li | 8.29635300  | 0.56023000  | 0.36219000  |
| Ar | 1.35330600  | -0.05976700 | -0.19926900 |

#####

**d1-Kr** charge=0 spin=1

|    |             |             |             |
|----|-------------|-------------|-------------|
| Cu | 1.63449200  | -0.31450700 | 0.03700200  |
| O  | -3.79499400 | 0.17800200  | -0.03945400 |
| O  | 3.43689600  | -0.42239900 | 0.15233400  |
| B  | 4.34629500  | 0.48752200  | 0.04441500  |
| B  | -4.99259600 | 0.34512700  | 0.03815100  |
| O  | 5.22265600  | 1.33853900  | -0.05567400 |
| O  | -6.30061000 | 0.46469900  | 0.13005200  |
| H  | -6.68478700 | 1.33857000  | 0.07151700  |
| Kr | -0.72209900 | -0.24588500 | -0.08487500 |

#####

**e1-Kr** charge=0 spin=1

|    |             |             |             |
|----|-------------|-------------|-------------|
| Ag | 1.49391000  | -0.24730100 | 0.03212400  |
| O  | -4.24596200 | 0.21618700  | 0.03153500  |
| O  | 3.48623600  | -0.53344200 | 0.32379300  |
| B  | 4.40982500  | 0.35571800  | 0.17452400  |
| B  | -5.44867900 | 0.20317400  | 0.17576500  |
| O  | 5.29367900  | 1.19574400  | 0.03478800  |
| O  | -6.75609200 | 0.12719400  | 0.31827100  |
| H  | -7.23410700 | 0.91741700  | 0.56642800  |
| Kr | -1.11134000 | -0.00372700 | -0.26374400 |

#####

**f1-Kr** charge=0 spin=1

|   |             |             |             |
|---|-------------|-------------|-------------|
| O | 4.77106200  | 1.38978700  | 0.04304900  |
| O | 3.09395600  | -0.47965100 | 0.27847500  |
| O | -4.37481400 | 0.21407000  | -0.07320100 |

|    |             |             |             |
|----|-------------|-------------|-------------|
| O  | -6.84422900 | 0.24856800  | 0.46454800  |
| B  | 3.94346100  | 0.49722200  | 0.15300700  |
| B  | -5.56457100 | 0.23708200  | 0.15518200  |
| Au | 1.14214400  | -0.20580900 | 0.02365300  |
| H  | -7.48140100 | 0.41888300  | -0.22793300 |
| Kr | -1.32806100 | 0.03295300  | -0.24679400 |

#####

**D1-Kr** charge=0 spin=1

|    |             |             |             |
|----|-------------|-------------|-------------|
| Cu | -1.74026500 | -0.29860400 | 0.04112600  |
| O  | -3.54513200 | -0.41809100 | 0.15123800  |
| O  | 3.51787900  | 0.05643900  | -0.11522900 |
| B  | 4.73152700  | 0.24142800  | -0.01414500 |
| B  | -4.47262900 | 0.47114300  | 0.04270600  |
| O  | 5.98805700  | 0.43420400  | 0.09258300  |
| O  | -5.37015000 | 1.30116800  | -0.05740000 |
| Li | 7.62202600  | 0.70920600  | 0.24389900  |
| Kr | 0.59949700  | -0.22279800 | -0.07324200 |

#####

**E1-Kr** charge=0 spin=1

|    |             |             |             |
|----|-------------|-------------|-------------|
| Ag | 1.59249200  | -0.23181900 | 0.04415400  |
| O  | -3.96614400 | 0.06580200  | -0.05931200 |
| O  | 3.59312500  | -0.48491600 | 0.33007800  |
| B  | 4.51371800  | 0.39881200  | 0.14490800  |
| B  | -5.18420800 | 0.17721000  | 0.08357800  |
| O  | 5.39854500  | 1.23290800  | -0.02772100 |
| O  | -6.44627000 | 0.29451300  | 0.23342800  |
| Li | -8.08629500 | 0.46717000  | 0.44888400  |
| Kr | -0.99638500 | -0.06257100 | -0.23266900 |

#####

**F1-Kr** charge=0 spin=1

|    |             |             |             |
|----|-------------|-------------|-------------|
| O  | 6.60078100  | 0.29720400  | 0.22935100  |
| O  | 4.12388700  | 0.12234900  | -0.11841600 |
| O  | -3.18906600 | -0.44395700 | 0.27191400  |
| O  | -4.86325600 | 1.42111800  | -0.00589200 |
| B  | 5.34100500  | 0.20817200  | 0.05124000  |
| B  | -4.03467500 | 0.53071400  | 0.12390900  |
| Au | -1.22898700 | -0.19978100 | 0.02948200  |
| Li | 8.24083100  | 0.42126300  | 0.48430600  |
| Kr | 1.23491900  | -0.00970200 | -0.21315000 |

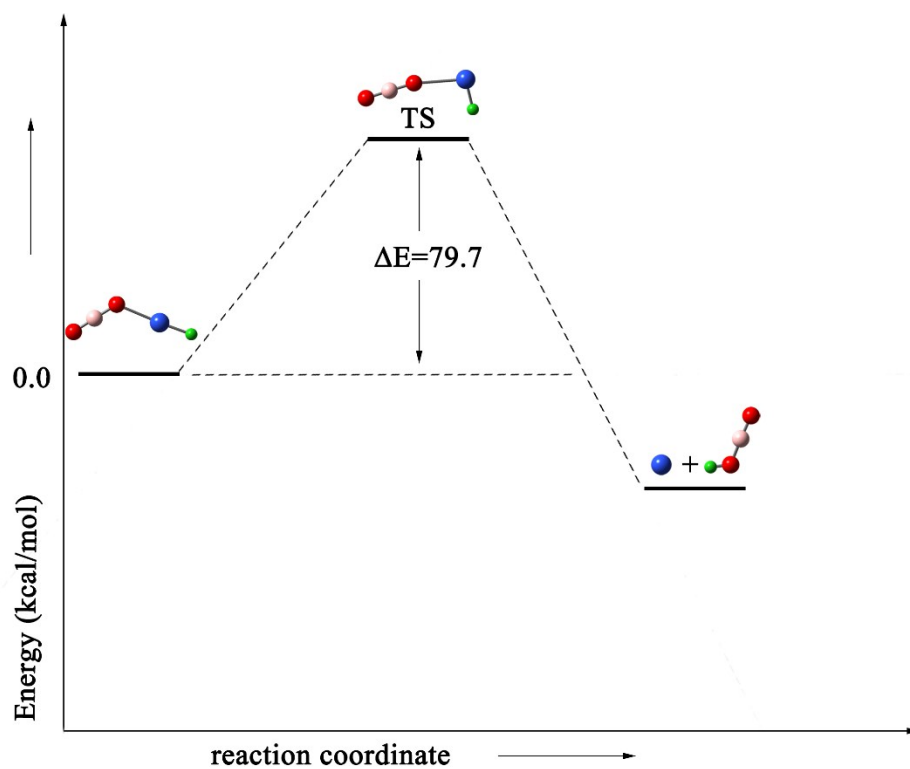

**Figure S1.** Energetics of fragmentation of structure **i-Xe**.

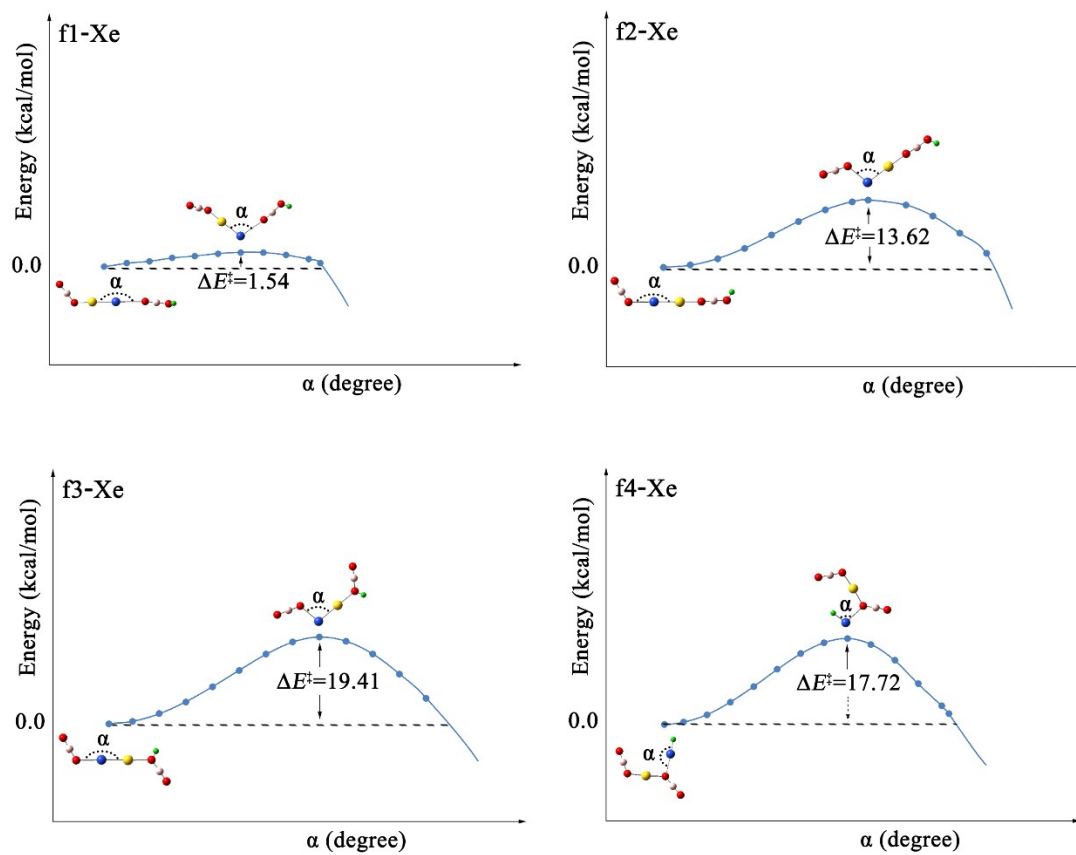

**Fig. S2** Energy scan for the formation of Au-O bond (H-O bond in the case of **f4-Xe**) at the  $\omega$ B97X-D/def2-TZVPP level, using as approximate reaction coordinate for the isomerization  $\text{HXeAu}(\text{BO}_2)_2 \rightarrow \text{XeHAu}(\text{BO}_2)_2$ .



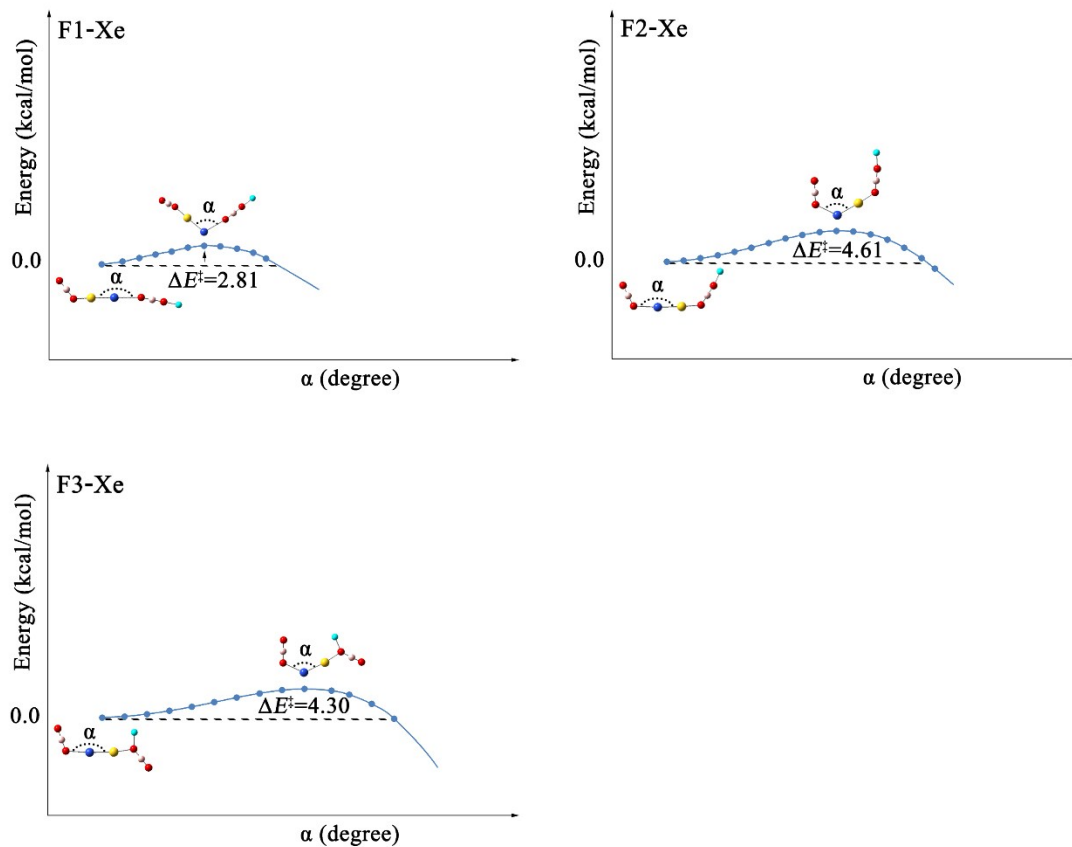

**Fig. S3** Energy scan for the formation of Au-O bond at the  $\omega$ B97X-D/def2-TZVPP level, using as approximate reaction coordinate for the isomerization  $\text{LiXeAu}(\text{BO}_2)_2 \rightarrow \text{XeLiAu}(\text{BO}_2)_2$ .

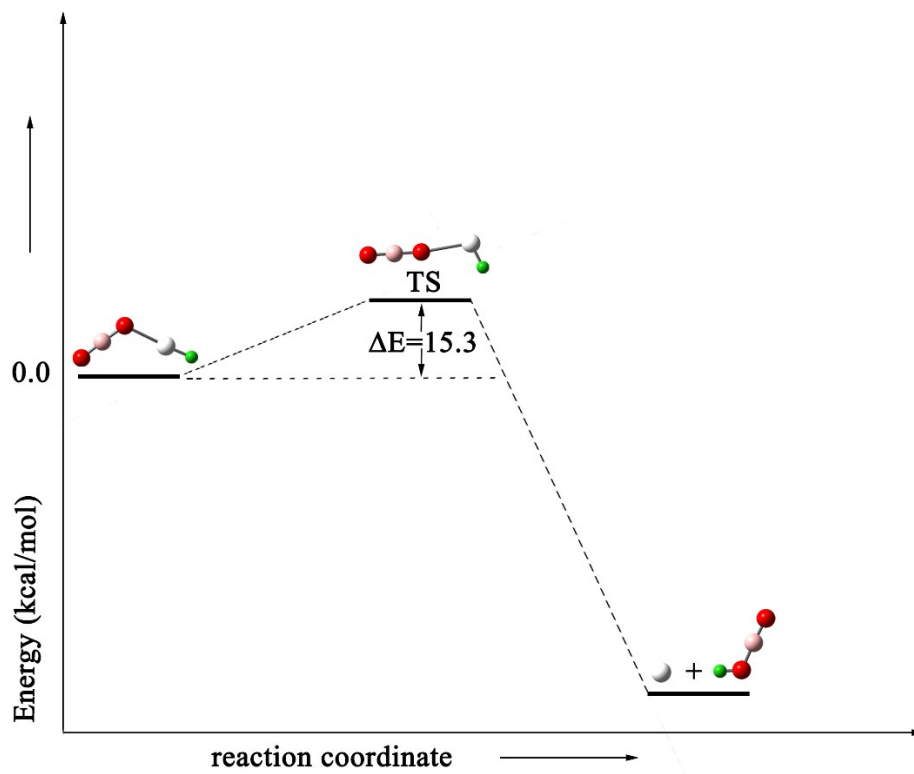

**Figure S4.** Energetics of fragmentation of structure **i-Ar**.

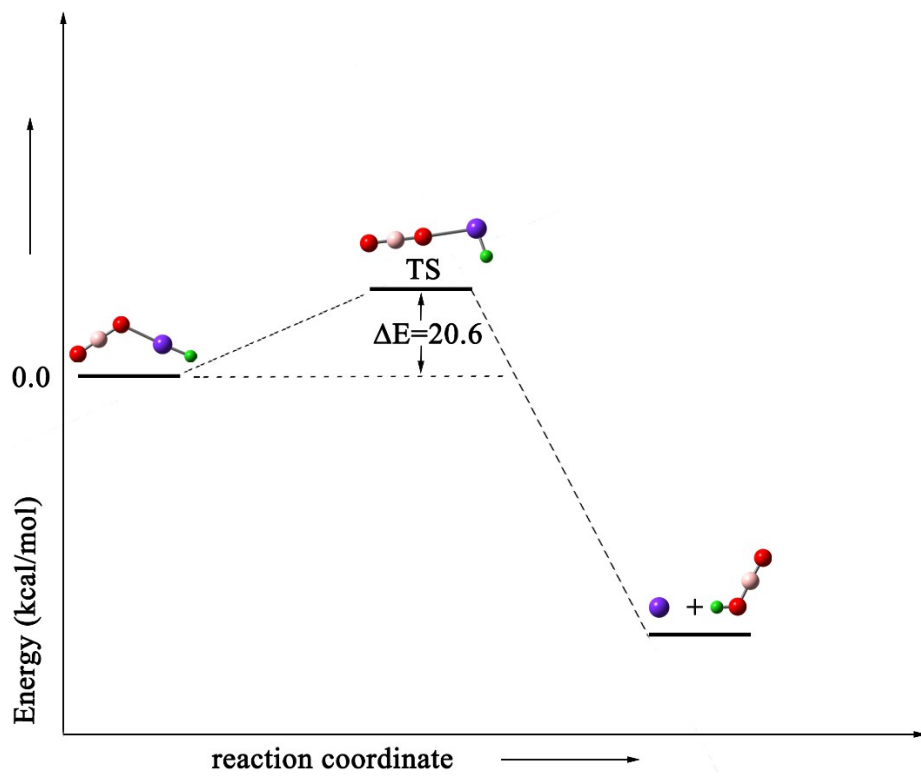

Figure S5. Energetics of fragmentation of structure **i-Kr**.
